# Supplementary material for: Finding a Secure Place in the Home during the First COVID-19 Lockdown: A Pattern-Oriented Analysis
Source: MDPI journal article supplement (doi:10.3390/bs13010009), 2022-12-22
Supplement: s1 [file s1]

**Table S1:** Fit indices of the LPA models

|   | Model1 |      |         |              | Model2      |             |         |                     | Model3 |      |         |              | Model6 |      |         |              |
|---|--------|------|---------|--------------|-------------|-------------|---------|---------------------|--------|------|---------|--------------|--------|------|---------|--------------|
|   | AIC    | BIC  | entropy | BLRT / p     | AIC         | BIC         | entropy | BLRT / p            | AIC    | BIC  | entropy | BLRT / p     | AIC    | BIC  | entropy | BLRT / p     |
| 1 | 8605   | 8642 | 1.00    |              | 8605        | 8642        | 1.00    |                     | 8573   | 8638 | 1.00    |              | 8573   | 8638 | 1.00    |              |
| 2 | 8425   | 8485 | 0.85    | 128.8 (<.01) | 7960        | 8039        | 0.68    | 663.2 (<.01)        | 8204   | 8292 | 0.96    | 119.9 (<.01) | 7911   | 8046 | 0.74    | 240.6 (<.01) |
| 3 | 8054   | 8138 | 0.91    | 95.0 (<.01)  | 7848        | 7968        | 0.68    | 130.1 (<.01)        | 8178   | 8289 | 0.73    | 58.4 (<.01)  | 7600   | 7803 | 0.79    | 63.7 (<.01)  |
| 4 | 8157   | 8264 | 0.67    | 0.0 (1.00)   | <b>7594</b> | <b>7756</b> | 0.68    | 272.2 (<.01)        | 8147   | 8281 | 0.67    | 0 (<.01)     | 7495   | 7768 | 0.74    | 98 (<.01)    |
| 5 | 8024   | 8153 | 0.68    | 9.5 (<.01)   | 7620        | 7824        | 0.70    | <b>-8.7 (1.000)</b> | 8022   | 8179 | 0.67    | -0.1 (<.01)  | 7455   | 7798 | 0.73    | 46.3 (<.01)  |
| 6 | 8034   | 8186 | 0.57    | 44.0 (0.87)  | <b>7503</b> | <b>7749</b> | 0.74    | 135.0 (<.01)        | 8032   | 8212 | 0.57    | 47.2 (0.85)  | 7405   | 7817 | 0.74    | -41.4 (<.01) |
| 7 | 8008   | 8184 | 0.58    | 26.0 (<.01)  | 7501        | 7788        | 0.73    | 20.5 (0.18)         | 8042   | 8245 | 0.51    | 51.1 (0.87)  | 7403   | 7884 | 0.77    | 97.5 (0.20)  |
| 8 | 8011   | 8210 | 0.57    | 42.2 (0.29)  | *           | *           | *       | *                   | 8048   | 8275 | 0.51    | 38.8 (0.60)  | 7371   | 7922 | 0.78    | 50.7 (<.01)  |

Note: bold values represent local minima for AIC and BIC and the first non-significant BLRT value

Model 1: equal variances and zero covariances; Model 2: varying variances and zero covariances; Model 3: equal variances and covariances; Model 4: varying variances and covariances

\* Model 2 with eight latent profiles did not converge
